# Supplementary material for: A quasi-zero-strain layered Nb4P2S21 cathode for high-energy solid-state polymer Na–metal batteries
Source: Royal Society of Chemistry journal article supplement (doi:10.1039/d4qi01500b), 2024-01-01
Supplement: d4qi01500b1.pdf [file d4qi01500b1.pdf]

## Quasi-Zero-Strain Layered Nb<sub>4</sub>P<sub>2</sub>S<sub>21</sub> Cathode for High-energy Solid-State Polymer Na-Metal batteries

Xueyang Tu<sup>a,b,d,†</sup>, Baixin Peng<sup>b,d,†</sup>, Xue Wang<sup>c,†</sup>, Xue Wang<sup>b,d</sup>, Shaoning Zhang<sup>g</sup>, Yuqiang Fang<sup>b</sup>, Wujie Dong<sup>b</sup>, Jiabo Le<sup>c\*</sup>, Keyan Hu<sup>a\*</sup> and Fuqiang Huang<sup>a,e,f\*</sup>

<sup>a</sup>*School of Mechanical and Electrical Engineering, Jingdezhen Ceramic University, Jingdezhen 333403, China.*

<sup>b</sup>*State Key Laboratory of High Performance Ceramics and Superfine Microstructure, Shanghai Institute of Ceramics, Chinese Academy of Sciences, Shanghai 200050, China.*

<sup>c</sup>*Ningbo Institute of Materials Technology and Engineering, Chinese Academy of Sciences, Ningbo 315201, Zhejiang, China.*

<sup>d</sup>*Center of Materials Science and Optoelectronics Engineering, University of Chinese Academy of Sciences, Beijing 100049, China.*

<sup>e</sup>*Zhangjiang Institute for Advanced Study, Shanghai Jiao Tong University, Shanghai 200240, China.*

<sup>f</sup>*State Key Lab of Metal Matrix Composites, School of Materials Science and Engineering, Shanghai Jiao Tong University, Shanghai 200240, China.*

<sup>g</sup>*School of Physical Science and Technology, ShanghaiTech University, Shanghai 200031, China.*

<sup>†</sup>These authors contributed equally to this work.

\*Corresponding authors. Email: huangfq@sjtu.edu.cn; Hukeyan123@126.com; lejiabo@nimte.ac.cn

### Experimental section

**Synthesis of Nb<sub>4</sub>P<sub>2</sub>S<sub>21</sub> cathode materials:** Nb<sub>4</sub>P<sub>2</sub>S<sub>21</sub> is synthesized by the solid-state reaction from a stoichiometric pure element in a flame-sealed quartz tube. After annealing at 700 C°, the brown powder of Nb<sub>4</sub>P<sub>2</sub>S<sub>21</sub> sample was collected.

**Solid polymer electrolyte preparation:** 3 M NaPF<sub>6</sub> (≥99.9%, DoDochem) was added into DME (97%, DoDochem), Then, the 3 M NaPF<sub>6</sub> in DME was mixed with DOL

( $\geq 99.9\%$ , DoDochem) (1:1 wt.%) to gain the LE. The solution was used on cells and stood for 3 days to complete the gelation process. All process was finished in the glove box ( $\text{H}_2\text{O} < 0.1$  ppm,  $\text{O}_2 < 0.1$  ppm).

**Material characterization:** X-ray diffraction patterns of  $\text{Nb}_4\text{P}_2\text{S}_{21}$  samples were obtained on a Bruker D8 Advance diffractometer equipped with mirror-monochromatic Cu K $\alpha$  radiation ( $\lambda = 0.15406$  nm) at a scan rate of  $10^\circ \text{ min}^{-1}$  with  $2\theta$  from  $10^\circ$  to  $60^\circ$ . The *in-situ* XRD spectra were obtained on a live discharge/charge process in a cell purchased from Beijing Scistar Technology Co. Ltd. The morphology of  $\text{Nb}_4\text{P}_2\text{S}_{21}$  was investigated by a JEOL (JSM6510) scanning electron microscope equipped with energy dispersive X-ray spectroscopy (EDXS, Oxford Instruments) and transmission electron microscopy (FEI Tecnai F20, USA). Raman spectra was obtained from a Jobin-Yvon LabRAM HR-800 spectrometer with a laser excitation at 532 nm. The High-resolution XPS spectra were obtained from an X-ray photoelectron spectrometer (XPS, Thermo Scientific, ESCALAB 250, USA).

**Electrochemical characterization:** The composite electrodes were fabricated from the active materials  $\text{Nb}_4\text{P}_2\text{S}_{21}$  powder (80 wt%), super P (10 wt%), and sodium alginate (SA) binder, and deionized water was used as a solvent to get a slurry. Then the slurry was coated evenly on a copper foil using a blade with a mass loading of  $\sim 1.8 \text{ mg cm}^{-2}$ . The electrode was then dried in a vacuum oven at  $80^\circ \text{C}$  for 8 h. The half cells were assembled in coin-type cells (MTI corporation-CR2032) within an Ar gas-filled glove box. A piece of sodium was utilized as the counter electrode. Glass fiber was utilized as a separator. A CHI1760e electrochemical workstation was used for the cyclic voltammetry (CV) tests with a potential range between 3 V and 1 V at different scan rates. A Land CT2001A tester (Wuhan, China) was applied to get the galvanostatic cycling performance and the GITT voltage profile of the assembled cells with a cutoff voltage between 3 V and 1 V at room temperature. Electrochemical impedance spectroscopy (EIS) was also tested with a CHI1760e electrochemical workstation at the frequency of 0.1 to 10000 Hz.

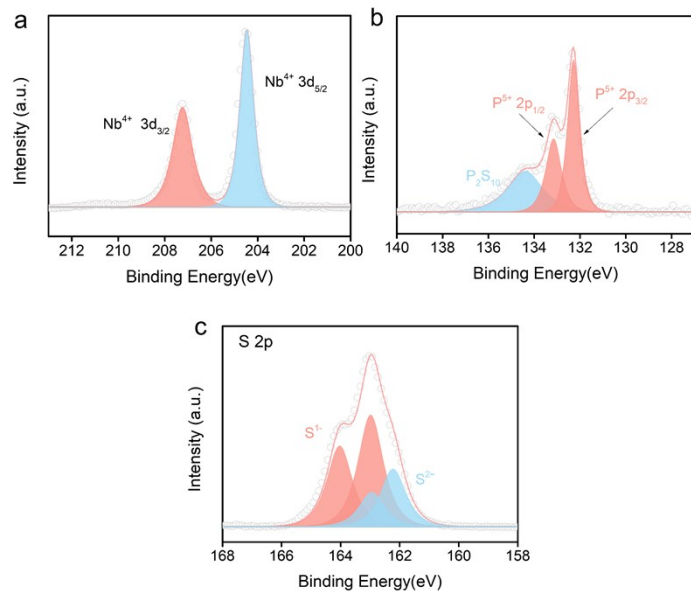

**Fig. S1** (a-c) High-resolution XPS spectra of Nb, P, and S.

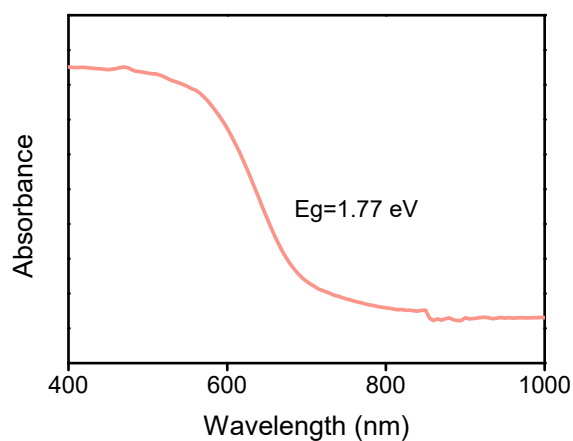

**Fig. S2** UV-vis spectrum of  $\text{Nb}_4\text{S}_2\text{S}_{21}$ .

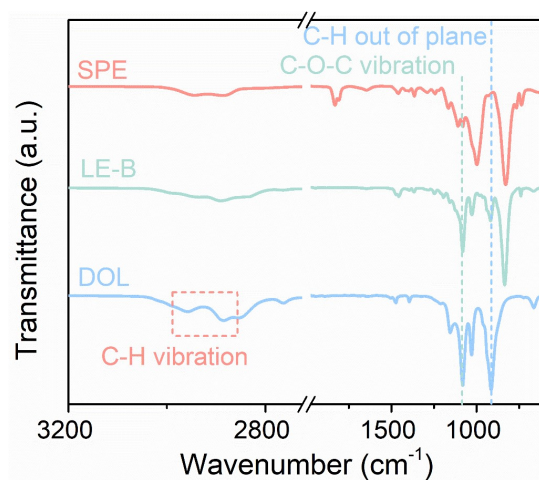

**Fig. S3** FT-IR spectra of DOL, LE, and SPE.

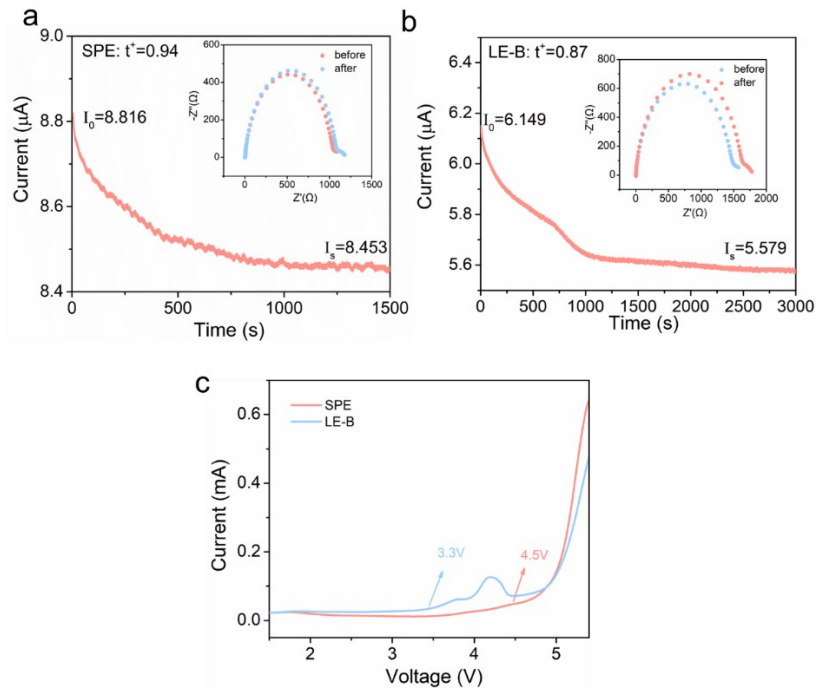

**Fig. S4** (a-b) Chronoamperometry curve of Na|Na cell in SPE and LE-B under a polarization voltage of 10 mV. (c) Linear sweep voltammetry with a scan rate of 5  $\text{mV s}^{-1}$  from 0 to 5 V.

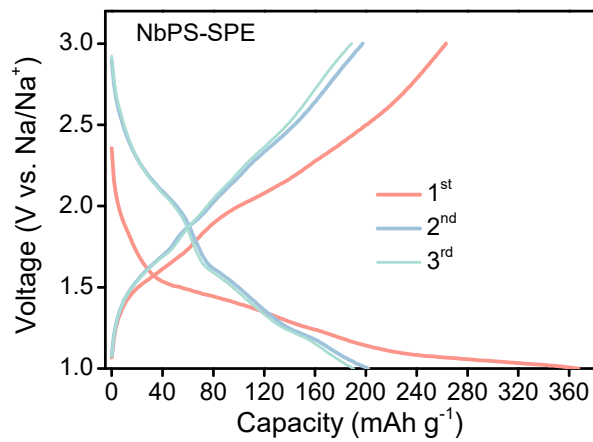

**Fig. S5** GCD curves of NbPS-SPE at initial three cycles.

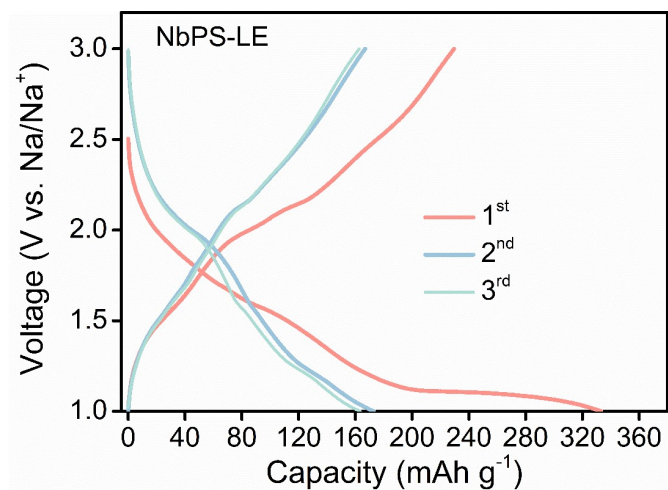

**Fig. S6** GCD curves of NbPS-LE at initial three cycles.

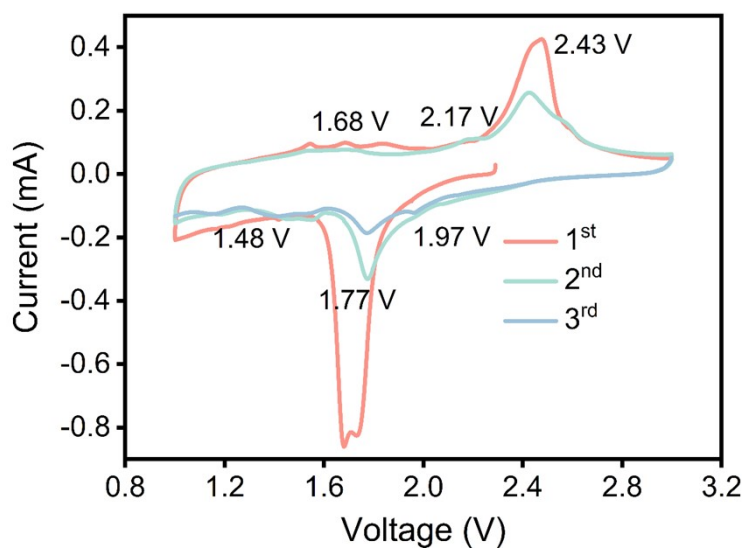

**Fig. S7** CV curves of Nb<sub>4</sub>P<sub>2</sub>S<sub>21</sub> cathode in liquid electrolyte.

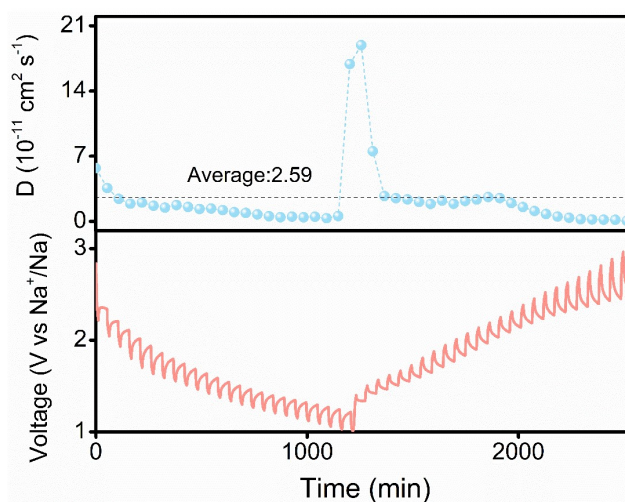

**Fig. S8** GITT potential of Nb<sub>4</sub>P<sub>2</sub>S<sub>21</sub> in the second cycle in LE.

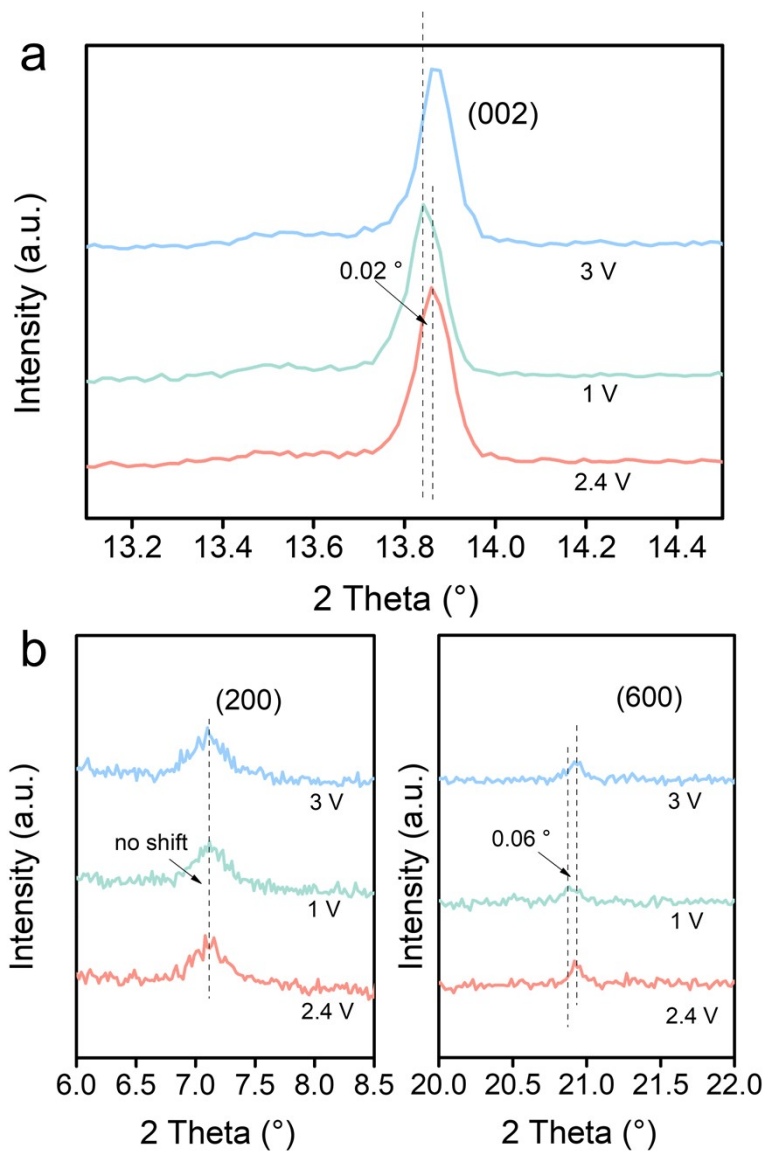

**Fig. S9** Shift of XRD peaks during the discharging/charging process. (a) (002) plane, (b) (200), and (600) plane.

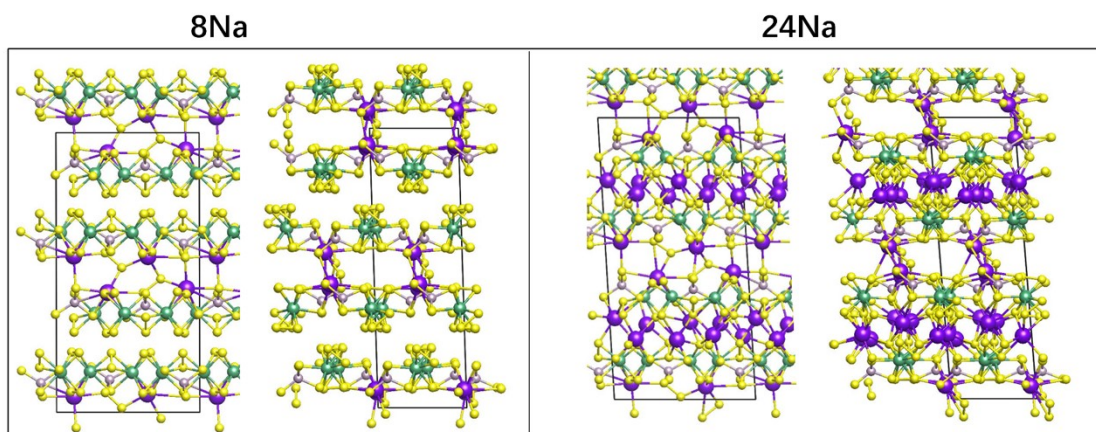

**Fig. S10**  $\text{Na}^+$  intercalation model in  $\text{Nb}_4\text{P}_2\text{S}_{21}$ .
